# Supplementary material
Source: HighWire-hosted journal article supplement (https://cmaj.ca/highwire/filestream/77808/field_highwire_adjunct_files/2/200840-res-3-at.pdf)
Supplement: 200840-res-3-at.pdf [file 200840-res-3-at.pdf]

### Appendix 3: Funding sources

Roche Diagnostics provided the troponin T assays as well as financial support for the VISION Study. Funding for this study came from more than 60 grants for VISION and its substudies. Canada: Canadian Institutes of Health Research (7 grants); Heart and Stroke Foundation of Ontario (2 grants); Academic Health Science Centres Alternative Funding Plan Innovation Fund Ontario; Population Health Research Institute; CLARITY Research Group; McMaster University Department of Surgery Surgical Associates; Hamilton Health Science New Investigator Fund; Hamilton Health Sciences; Ontario Ministry of Resource and Innovation; Stryker Canada; McMaster University, Department of Anesthesiology (2 grants); St Joseph's Healthcare, Department of Medicine (2 grants); Father Sean O'Sullivan Research Centre (2 grants); McMaster University Department of Medicine (2 grants); Roche Diagnostics Global Office (5 grants); Hamilton Health Sciences Summer Studentships (6 grants); McMaster University Department of Clinical Epidemiology and Biostatistics; McMaster University, Division of Cardiology; Canadian Network and Centre for Trials Internationally; Winnipeg Health Sciences Foundation; University of Manitoba Department of Surgery (2 grants); Diagnostic Services of Manitoba Research; Manitoba Medical Services Foundation; Manitoba Health Research Council; University of Manitoba Faculty of Dentistry Operational Fund; University of Manitoba Department of Anesthesia; University Medical Group, Department of Surgery, University of Manitoba, Start-up Fund. Australia: National Health and Medical Research Council Program. Brazil: Projeto Hospitais de Excelência a Serviço do SUS (PROADI-SUS) grant from the Brazilian Ministry of Health in partnership with Hcor (Cardiac Hospital Sao Paulo-SP); National Council for Scientific and Technological Development (CNPq) grant from the Brazilian Ministry of Science and Technology. China: Public Policy Research Fund (grant CUHK-4002-PPR-3), Research Grant Council, Hong Kong SAR; General Research Fund (grant 461412), Research Grant Council, Hong Kong SAR; Australian and New Zealand College of Anaesthetists (grant 13/008). Colombia: School of Nursing, Universidad Industrial de Santander; Grupo de Cardiología Preventiva, Universidad Autónoma de Bucaramanga; Fundación Cardioinfantil-Instituto de Cardiología; Alianza Diagnóstica SA. France: Université Pierre et Marie Curie, Département d'anesthésie Réanimation, Pitié-Salpêtrière, Assistance Publique-Hôpitaux de Paris. India: St John's Medical College and Research Institute; Division of Clinical Research and Training. Malaysia: University of Malaya (grant RG302-14AFR); University of Malaya, Penyelidikan Jangka Pendek. Poland: Polish Ministry of Science and Higher Education (grant NN402083939). South Africa: University of KwaZulu-Natal. Spain: Instituto de Salud Carlos III; Fundació La Marató de TV3. United States: American Heart Association; Covidien. United Kingdom: National Institute for Health Research.
